# Supplementary material
Source: Springer Nature journal article supplement (https://www.springermedizin.de/resource/supplementary/12958_2014_1204_MOESM1_ESM.pdf/9567046)

Patients with 30-50 % of follicles  $\geq$  18 mm and serum progesterone  $\leq$  1 ng/ml

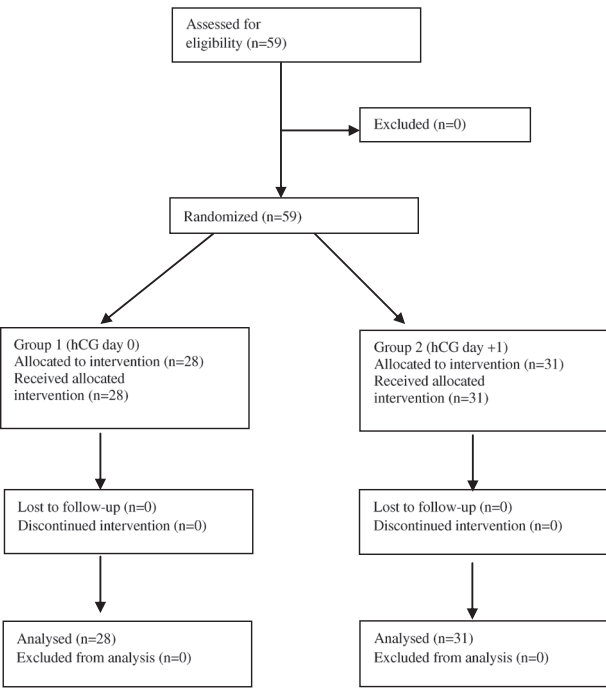

Patients with serum progesterone  $>$  1 ng/ml

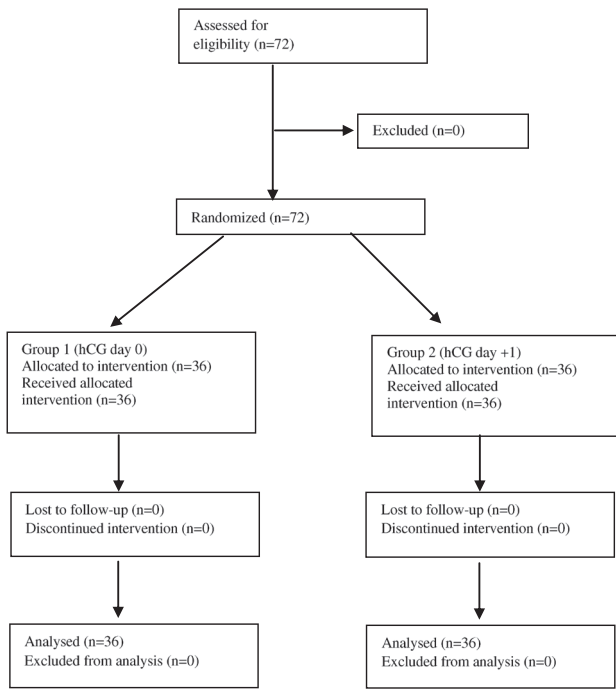

Supplement: MOESM1 [file 9567046]
